# Supplementary material for: Site-selective modification of proteins using cucurbit[7]uril as supramolecular protection for N-terminal aromatic amino acids
Source: Royal Society of Chemistry journal article supplement (doi:10.1039/d0ob01004a), 2020-01-01
Supplement: d0ob01004a1.pdf [file d0ob01004a1.pdf]

## Supporting information

### Site-Selective Modification of Proteins Using Cucurbit[7]uril as Supramolecular Protection for N-terminal Aromatic Amino Acids

Anton A. A. Smith,<sup>a,b</sup> Caitlin L. Maikawa,<sup>a</sup> Gillie A. Roth<sup>a</sup> and Eric A. Appel<sup>c</sup>

#### Materials

All reagents were acquired through Millipore-Sigma.

#### Insulin modification and digestion

An insulin stock solution of 4 mg/mL was prepared by dispersing 8 mg of insulin in 0.5 mL milliQ water and acidifying with 1  $\mu$ L aq HCl (conc) until the dispersed powder dissolved. 0.5 mL 2x PBS pH 7.3 buffer was added, resulting in a temporarily cloudy precipitate that quickly dissipates.

Cucurbit[7]uril (10  $\mu$ L, 6.8 mM or 3.7 mM, solution in PBS) was added to insulin (20  $\mu$ L, 0.69 mM, 4 mg/mL). This resulted in an opaque suspension believed to be Insulin complexed with CB[7]. This effect was not due to a drop in pH beyond buffer capacity. m-dPEG<sub>8</sub>-NHS ester was added from a freshly prepared stock solution (8  $\mu$ L, 3.9 mM or 84.4 mM). This solution was incubated for 37 °C for 2 hours. Glu-C digestion was performed by adding Glu-c (8  $\mu$ L, 1 mg/mL) and incubated at 37 °C for a minimum of 4 hours. DTT reduction of non-digested insulin was performed by adding 10  $\mu$ L 5 mM DTT, instead of Glu-c. Solutions for MS were prepared by 100x dilution into 1:1 ACN:water.

#### LC-MS Methods

Samples were analyzed by LC-ESI/MS on a Waters Acquity UPLC and SQD2 single quadrupole mass spectrometer. A Zorbax 300SB-C8 2.1x50mm 3.5 $\mu$ m HPLC column was used with the following gradient:

| Time (mins) | Flow rate (mL/min) | Solvent A (0.1% formic acid in water) | Solvent B (0.1% formic acid in acetonitrile) |
|-------------|--------------------|---------------------------------------|----------------------------------------------|
| 0           | 0.3                | 98                                    | 2                                            |
| 2           | 0.3                | 98                                    | 2                                            |
| 6           | 0.3                | 5                                     | 95                                           |
| 8           | 0.3                | 5                                     | 95                                           |
| 8.5         | 0.3                | 98                                    | 2                                            |
| 9.5         | 0.3                | 5                                     | 95                                           |
| 10.5        | 0.3                | 5                                     | 95                                           |
| 11          | 0.3                | 98                                    | 2                                            |
| 15          | 0.3                | 98                                    | 2                                            |

Data was collected in positive ion, full scan MS mode with a mass range of 50-2000 Da. High-resolution masses were determined on a Waters Acquity UPLC and Thermo Exactive Orbitrap Mass Spectrometer. An Agilent Poroshell C18 2.1x50mm 2.7 $\mu$ m HPLC column, with an identical gradient as above, was used for separation. Data was collected in positive ion, full scan MS mode with a mass range of 100-2000 Da, Maximum ion injection time 250 ms, Resolution=50K, AGC=1x10<sup>6</sup>.

## Insulin + 2.2 NHS-PEG

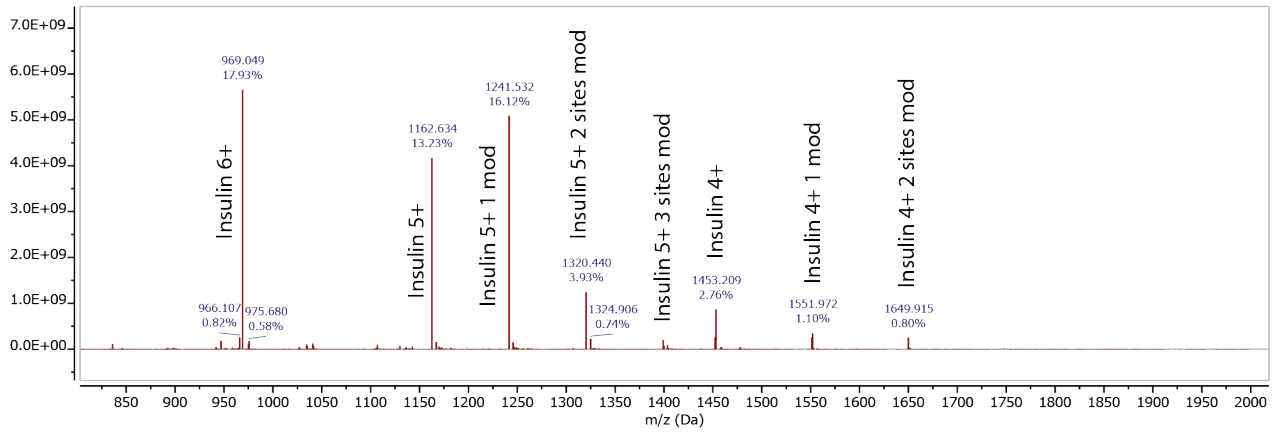

## Insulin + 5 eq CB[7] + 2.2 NHS-PEG

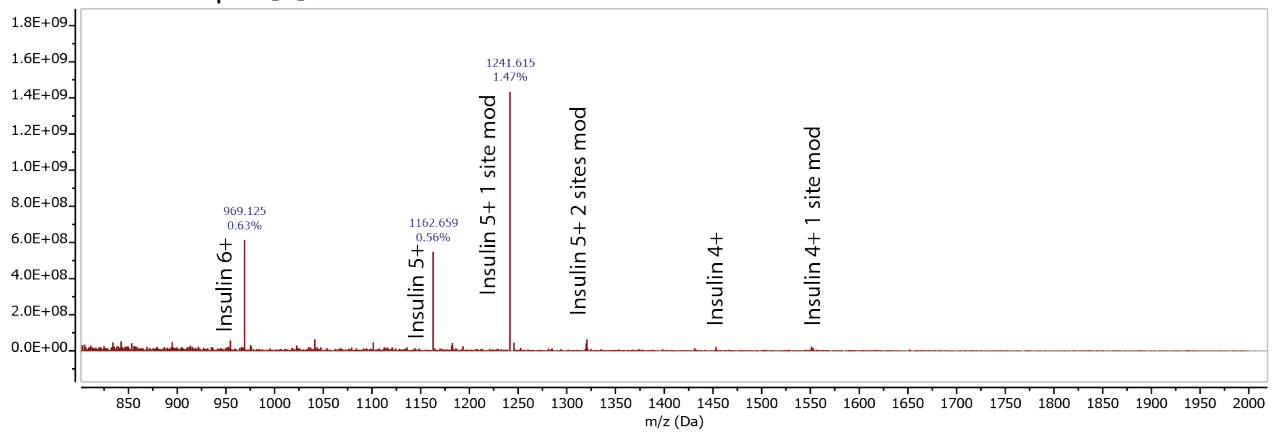

**Figure S1:** Low resolution mass spectrometry of whole insulin modified with 2.2 eq NHS-PEG ester in the absence (top) or presence (bottom) of CB[7].

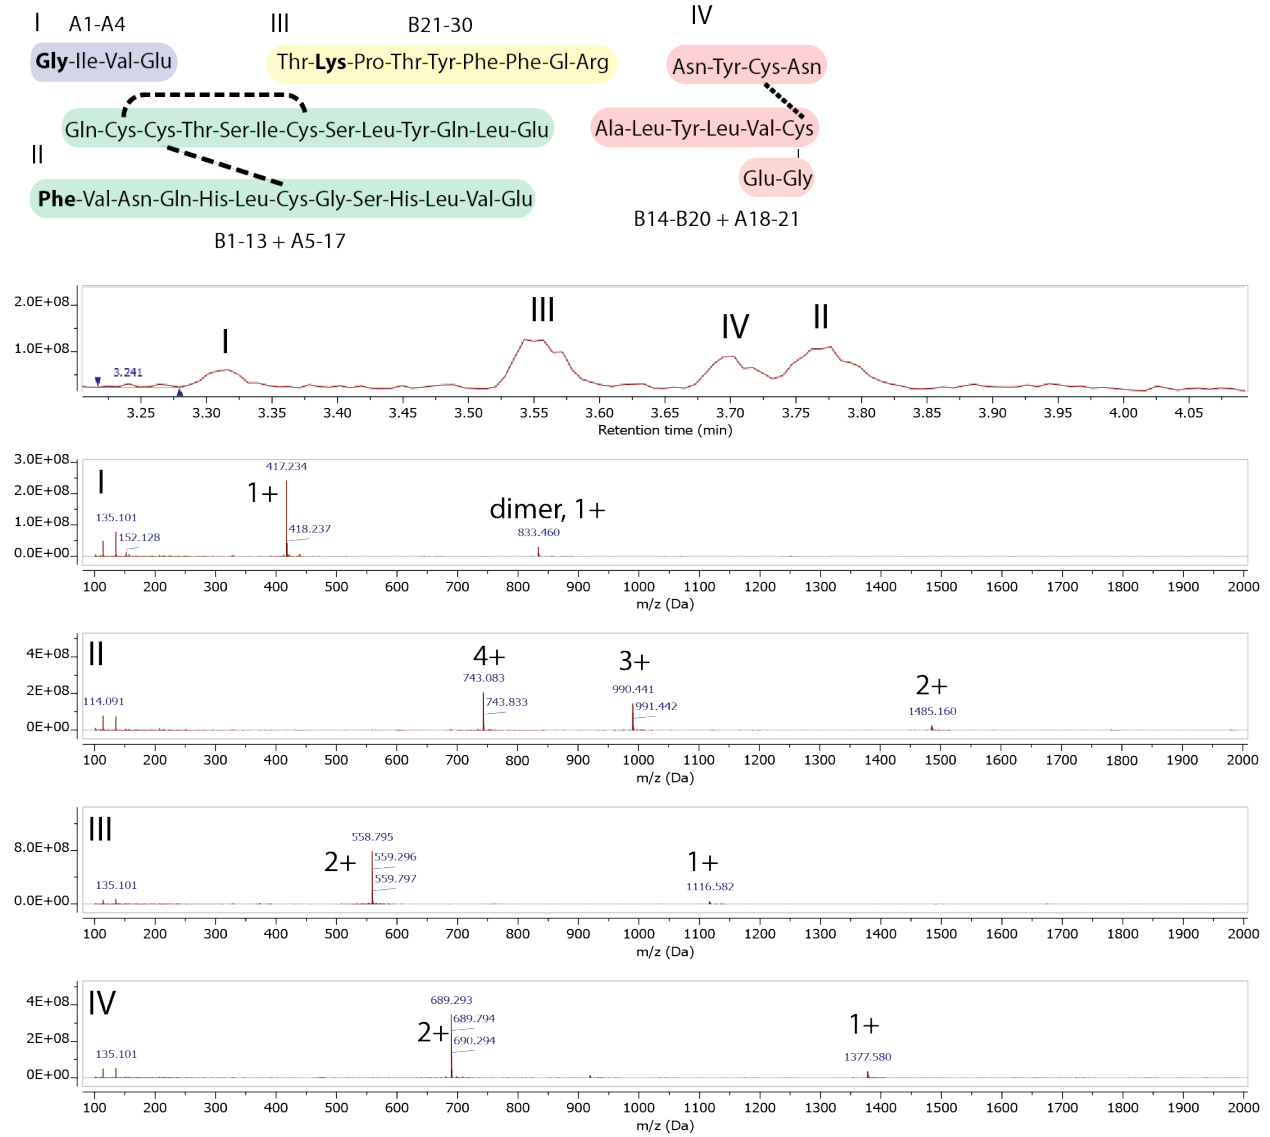

**Figure S2:** Glu-C digested insulin with identified fragments, high resolution. Top bar shows ion count intensity elugram, with masses corresponding to each of the fragments shown in the lower 4 panels.

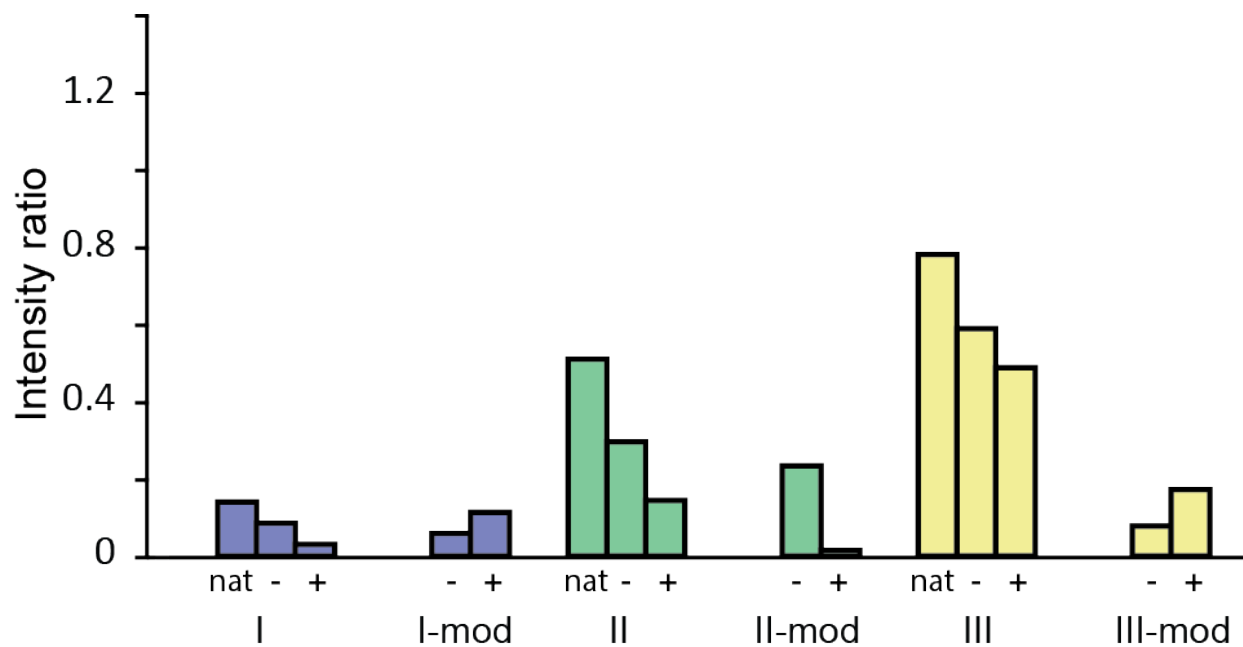

**Figure S3:** Intensity ratios of fragments, relative to fragment IV. Either native unmodified insulin, insulin modified with 2.2 equivalents m-dPEG<sub>8</sub>-NHS ester, with or without 5 eq. of CB[7] added. In the presence of CB[7], I and III is modified to a greater extent. II appears to be almost completely non-modified, but shows an overall decreased intensity in the presence of CB[7], likely as a consequence of complexation with CB[7]. Each fragment intensity is from all isotopes and m/z from Figure S6 and Figure S7

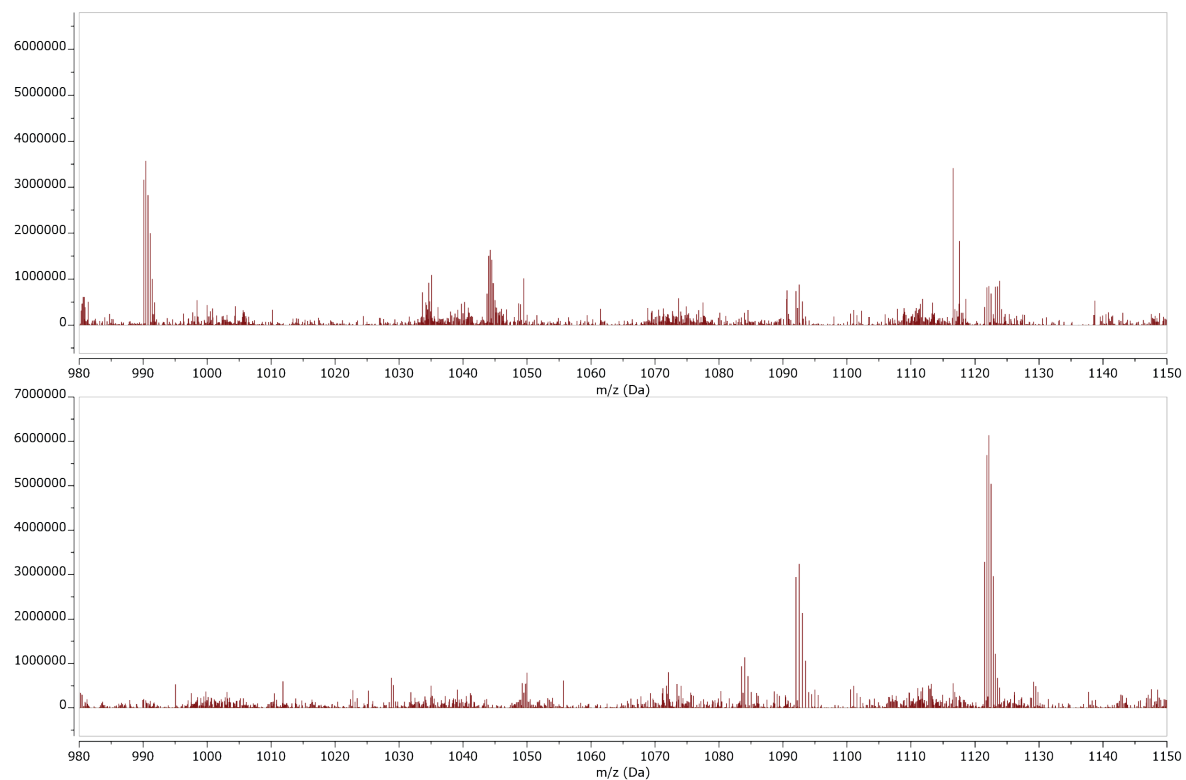

**Figure S4:** Insulin incubated with 50 eq. of m-dPEG-NHS ester, in the presence of 2.7 equivalents of CB[7] (top) or absence of CB[7] (bottom). In the absence of CB[7], the  $+3\text{H}^+$  ion ( $m/z$  990) from fragment II is greatly reduced, while CB[7] reduces the  $+3\text{H}^+$  ion of the modified fragment II ( $m/z$  1122) .

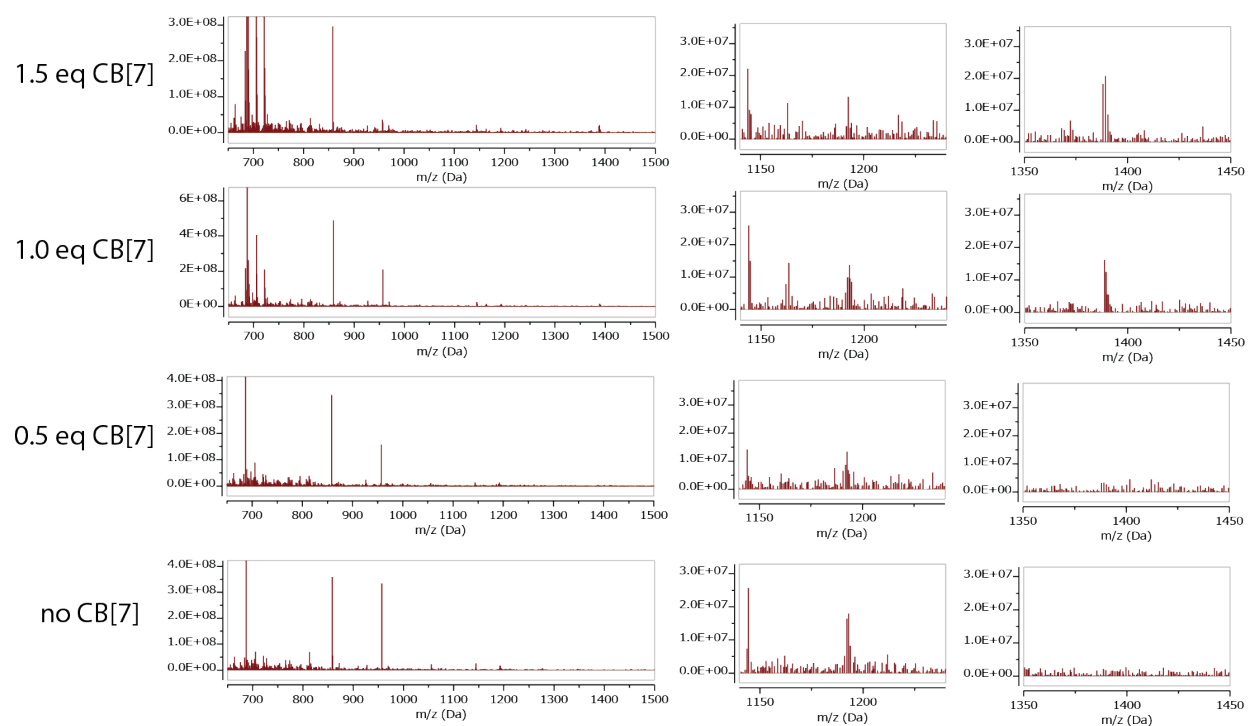

**Figure S5:** Various amounts of CB[7] with insulin and 1.5 eq m-dPEG<sub>8</sub>-NHS, followed by a reduction with DTT. m/z 1192 is the native A chain +2H<sup>+</sup> (monoisotopic mass = 2381.989u), with the modified fragment found at m/z 1387. m/z 858.42 is the +4H<sup>+</sup> ion of the B chain (monoisotopic mass = 3427.67u), with the modified fragment found at m/z 955.9. Lower intensities are seen for the A chain, due to a lack of multiple positively charged amino acids. An increase in A chain functionalization is seen with increasing CB[7], with a corresponding decrease in B chain functionalization.

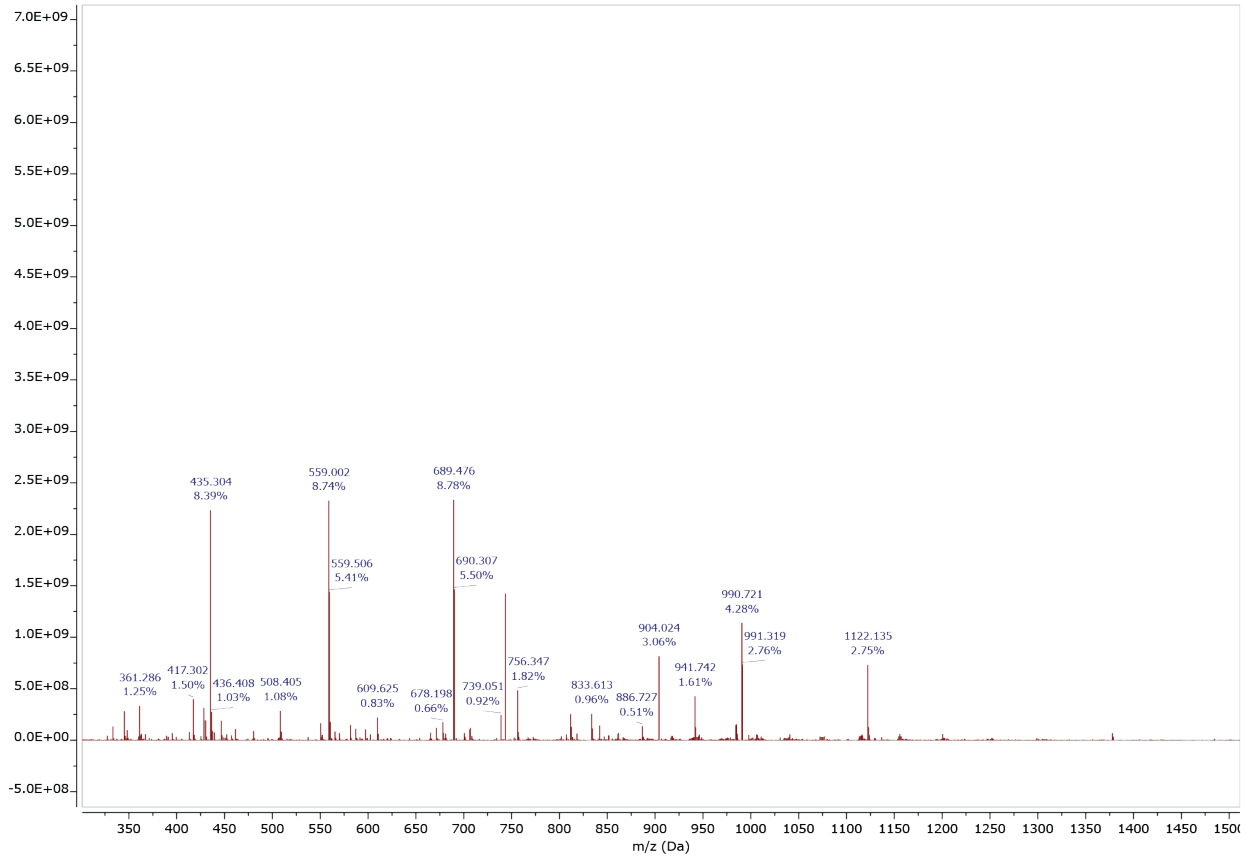

**Figure S6:** Insulin + 2.2 eq m-dPEG<sub>8</sub>-NHS, digested. m/z 417.3 Fragment I +H<sup>+</sup>, m/z 435.3 m-dPEG<sub>8</sub>-COOH, m/z 559.0 Fragment III +2H<sup>+</sup>, m/z 689.5 Fragment IV +2H<sup>+</sup>, m/z 743.1 Fragment II modified +4H<sup>+</sup>, m/z 756.4 Fragment III +2H<sup>+</sup>, m/z 811.6 Fragment I modified +H<sup>+</sup>, m/z 833.6 Fragment I dimer +H<sup>+</sup>, m/z 990.7 Fragment II +3H<sup>+</sup>, m/z 1122.1 Fragment II +3H<sup>+</sup>.

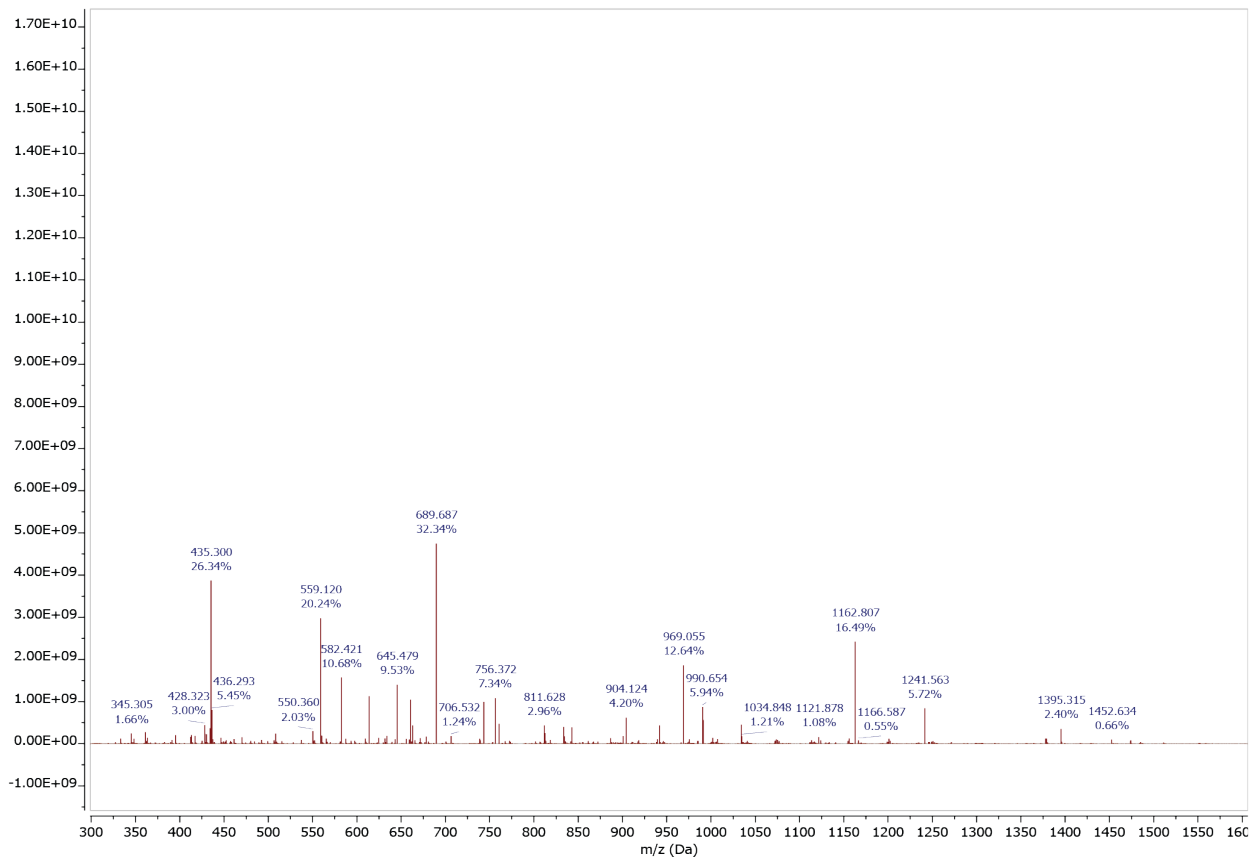

**Figure S7:** Insulin + 5 eq CB[7] + 2.2 eq m-dPEG<sub>8</sub>-NHS. Insulin + 2.2 eq m-dPEG<sub>8</sub>-NHS, digested. m/z 435.3 m-dPEG<sub>8</sub>-COOH, m/z 559.0 Fragment III +2H<sup>+</sup>, m/z 689.5 Fragment IV +2H<sup>+</sup>, m/z 743.1 Fragment II modified +4H<sup>+</sup>, m/z 756.4 Fragment III +2H<sup>+</sup>, m/z 811.6 Fragment I modified +H<sup>+</sup>, m/z 969.1 Insulin +5H<sup>+</sup>, m/z 1162.8 Insulin +6H<sup>+</sup>, m/z 990.7 Fragment II +3H<sup>+</sup>, m/z 1122.1 Fragment II +3H<sup>+</sup>, m/z 1241.6 insulin 1 mod +5 H<sup>+</sup>, m/z 1395.3 insulin+CB[7] +5 H<sup>+</sup>.



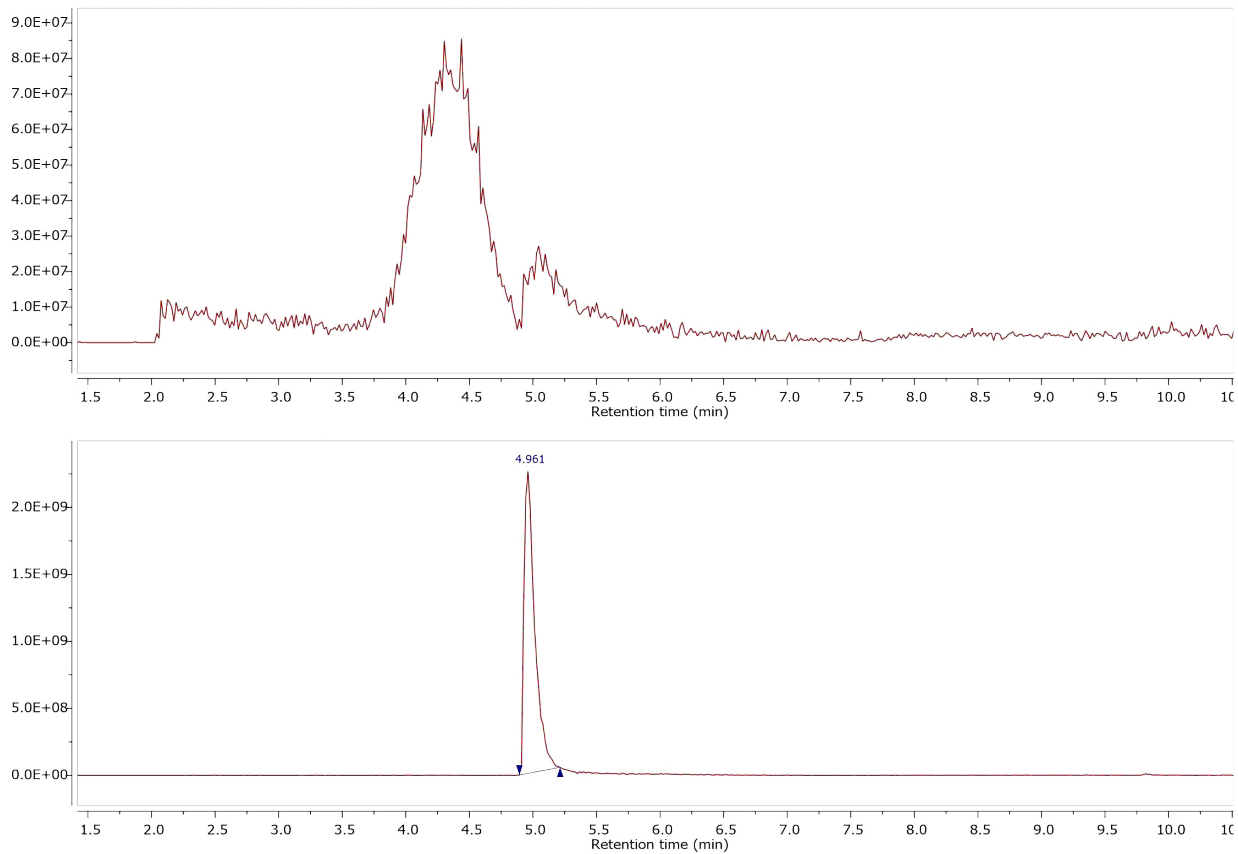

**Figure S8:** (top) TIC elugram for m/z associated with CB[7]. (bottom) m/z 582 TIC elugram for m/z associated with intact insulin, m/z 958. The different elution times show that HPLC can sufficiently separate the non-covalent complex between insulin and CB[7]
